# Supplementary material for: Inhibition of Proliferation in U937 Cells Treated by Blue Light Irradiation and Combined Blue Light Irradiation/Drug
Source: PubMed Central journal article supplement (PMC5983758; doi:10.3390/ijms19051464), 2018-05-15
Supplement: ijms-19-01464-s001.pdf [file ijms-19-01464-s001.pdf]

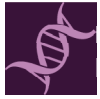

# Inhibition of Proliferation in U937 Cells Treated by Blue Light Irradiation and Combined Blue Light Irradiation/Drug

Jianjian Zhuang, Junsong Liu, Xuan Gao, Hongdong Li\*

State Key Laboratory of Superhard Materials, Jilin University, Changchun 130012, China;

\* Correspondence: hdli@jlu.edu.cn; Tel.: +86-431-85168881

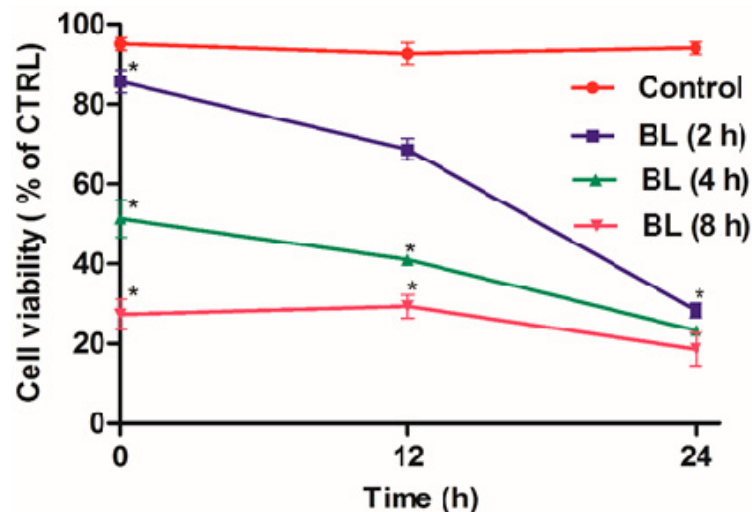

**Figure S1.** The proliferation inhibition of BL irradiation in U937 cells. The proliferation inhibition of U937 cells irradiated by BL for 2 h, 4 h, 8 h, and incubated for another 0 h, 12 h, 24 h. The cells viabilities are evaluated using cell CCK-8 assay, and the absorbance values are measured at 450 nm. These cells are divided into three groups for irradiation treatment, and the irradiation time is 2 h, 4 h and 8 h, respectively. Then, all cells are incubated respectively for 0 h, 12 h and 24 h. The proliferation inhibition ratios of cells irradiated for 2 h after being incubated for 0 h, 12 h and 24 h are 14.4%, 31.4%, 72.1%; cells irradiated for 4 h after being incubated for 0 h, 12 h and 24 h are 48.7%, 59.0%, 76.5%; cells irradiated for 8 h after being incubated for 0 h, 12 h and 24 h are 72.7%, 70.7%, 82.3%, respectively. Data shown are the means  $\pm$  SD. \*  $p < 0.05$  vs control group.

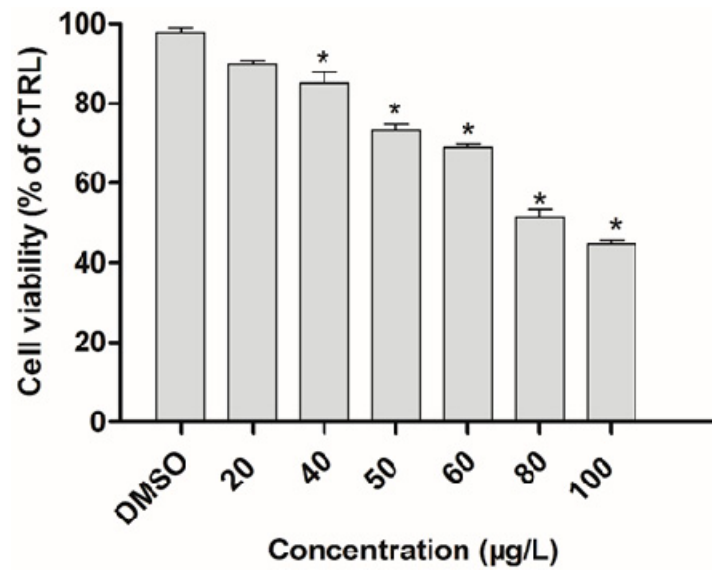

**Figure S2.** The proliferation inhibition of HHT treated U937 cells. The cells are incubated with the indicated concentration of HHT. After incubated for 24 h, the cells viabilities are evaluated using CCK-8 assay and the absorbance values are measured at 450 nm. Values shown are the means  $\pm$  SD ( $n = 3$ ). \*  $p < 0.05$  vs DMSO.

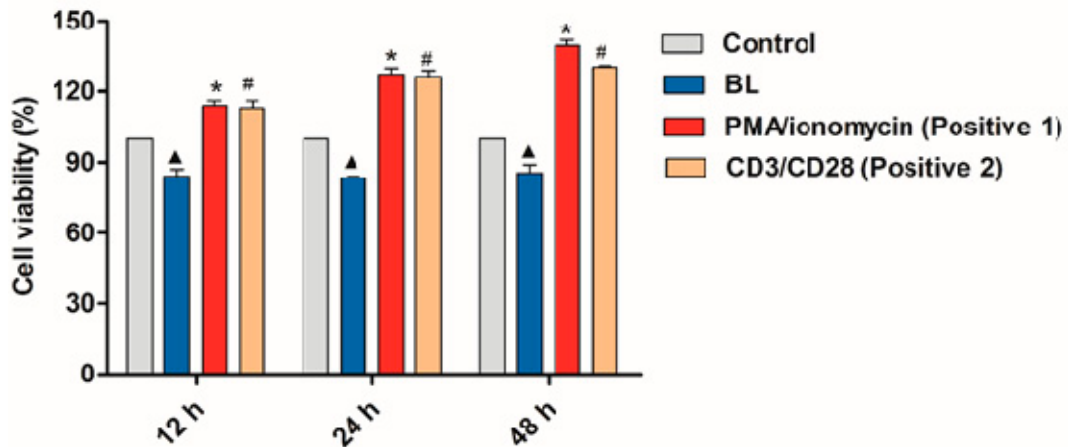

**Figure S3.** The specific proliferation inhibition of BL irradiation on PBMC. The isolated PBMC are irradiated by BL irradiation for 2 h, after incubated for 12 h, 24 h, 48 h. The cells viabilities are evaluated using CCK-8 assay, and the absorbance values are measured at 450 nm. PBMC cells are stimulated by PMA/ionomycin and CD3/CD28 antibody is set as Positive 1 and Positive 2, respectively. The control group is referred as 100% of viable cells. Values shown are the means  $\pm$  SD ( $n = 3$ ). ▲  $p < 0.05$  vs Control, \*  $p < 0.05$  vs Positive 1, #  $p < 0.01$  vs Positive 2.
